# Supplementary material
Source: HighWire-hosted journal article supplement (https://www.qdcxjkg.com/highwire/filestream/113561/field_highwire_adjunct_files/5/20_Clara1942.pdf)
Supplement: 20_Clara1942.pdf [file 20_Clara1942.pdf]

Reference no. 20 of

Winkelmann A, Noack T: The Clara cell – a 'Third Reich eponym'? *Eur Respir J* 2010; 36: 722–727

Clara M: Letter to Max de Crinis, dated 2 January 1942. 1942. *Archive*: Bundesarchiv, Berlin. *Signature*: BArch (ehem. BDC), PK, Clara, Max, 12.12.1899.

**Short comment by the authors:**

Max de Crinis, to whom Max Clara wrote this letter, was in a position at the Ministry of Higher Education to decide about suggestions of the faculties for new appointments to vacant chairs. In this letter, Clara refers to earlier correspondence regarding the official suggestion (*Vorschlag*) of the Medical Faculty of Munich University for the Chair of Anatomy. The letter indicates that Clara and de Crinis had already reached an agreement that Clara would be appointed to the Chair. Clara expresses his concerns that the Ministry had not yet received the university's official suggestion.

Anatomische Anstalt  
Universität Leipzig

Liebigstraße 13

Leipzig C 1, den 2. Januar 1942.

Fernsprecher 20497

Herrn

Professor Dr.M.de Crinis

B e r l i n W 8

Lieber Pg. de Crinis !

Für die umgehende Beantwortung meiner Anfrage danke ich Dir bestens. Die Tatsache, dass der Vorschlag aus München noch immer nicht bei Dir eingetroffen ist, beunruhigt mich etwas, da ich die Möglichkeit nicht ausschliessen kann, dass man im Bayrischen Ministerium noch Quertreibereien versucht. Wenn die Sache sich noch länger hinauszieht, wird auch die hiesige Neubesetzung immer schwieriger, weil ja immer weniger Zeit zur Verfügung steht; wenn wir beide auch hinsichtlich der Neubesetzung einig sind, so muss man doch der Fakultät die Möglichkeit geben, so zu tun, wie sie tun möchte. Der Vorschlag wird dann schon so sein, wie es Dir erwünscht ist. Ich weiss nicht, ob es möglich ist, dass Du beim Rektor in M. die Angelegenheit urgierst; der Rektor könnte von sich aus dann sehr wohl auch beim Bayrischen Ministerium das Nötige veranlassen, falls Du dies nicht auch unmittelbar machen willst.

Mit den besten Wünschen für 1942 und Herzlichen

Grüssen

Prof. Clara  
Arminy 19. I.

Heil Hitler!

*Ich hätte Prof. C. mit, dass  
ein Hinweis auf mich  
eingesendet sei, dass in der  
nächsten Folge der Fakultät der Rektor  
mit dem H. A.*

*lit. G.T. Meiner Briefe  
an München eingegangen*
